# Supplementary material for: Pesticide Use Practices in Root, Tuber, and Banana Crops by Smallholder Farmers in Rwanda and Burundi
Source: MDPI journal article supplement (doi:10.3390/ijerph16030400), 2019-01-31
Supplement: s1 [file s1]

# Questionnaire: Farmer's perception of the impact of pests and diseases on potato, sweetpotato, banana and cassava

## Part A: Interview background

Questionnaire No.....

- Which of these crops is this household producing during this 2<sup>nd</sup> cropping season 2014 B? (Yes/No)  
(i) potatoes ..... (ii) sweetpotatoes..... (iii) bananas/plantain..... (iv) cassava .....
- Respondent's name:.....Mobile No(s):.....
- Date of interview:.....Interviewed by:.....Checked by:.....
- Country:.....Province:.....District:.....Sector:.....Cell:.....Village.....
- Latitude:.....Longitude:.....Elevation (m):.....

## Part B: Current household composition and Characteristics

How many people do live in this household during this cropping season?

Children (0-5yrs).....Children (6-17).....Men (18-65).....Women (18-65).....Elderly men (≥ 65 yrs)..... Elderly women (≥ 65 yrs).....

| Name<br>(Please give the details of both the husband and the wife for each column in this table) | Sex | Relationship to HH head<br>Codes A | Marital status<br>Codes B | Age (years) | Formal Education |              | Occupation<br>Codes D |        | Annual income (RWF/BIF) |          |
|--------------------------------------------------------------------------------------------------|-----|------------------------------------|---------------------------|-------------|------------------|--------------|-----------------------|--------|-------------------------|----------|
|                                                                                                  |     |                                    |                           |             | Codes C          | School Years | Main                  | Second | Farm                    | Off-farm |
| .....(HH head)                                                                                   |     |                                    |                           |             |                  |              |                       |        |                         |          |
| .....(Spouse)                                                                                    |     |                                    |                           |             |                  |              |                       |        |                         |          |

|                                                                                                                  |                                                                                                     |                                                                                                                                                                      |                                                                                                                                                                    |                                                                                                                                                                                                  |                                                                                          |
|------------------------------------------------------------------------------------------------------------------|-----------------------------------------------------------------------------------------------------|----------------------------------------------------------------------------------------------------------------------------------------------------------------------|--------------------------------------------------------------------------------------------------------------------------------------------------------------------|--------------------------------------------------------------------------------------------------------------------------------------------------------------------------------------------------|------------------------------------------------------------------------------------------|
| <b>Codes A</b><br>1. HH head<br>2. Spouse<br>3. Hired worker<br>4. Son<br>5. Daughter<br>6. Brother<br>7. Sister | 8. Son in-law<br>9. Daughter in-law<br>10. Grand child<br>11. Other relative<br>12. Other (specify) | <b>Codes B</b><br>1. Married living with spouse<br>2. Married but spouse away<br>3. Divorced/Separated<br>4. Widow/Widower<br>5. Never married<br>6. Other (Specify) | <b>Codes C</b><br>1. None<br>2. Primary<br>3. Secondary Ordinary<br>4. Secondary Advanced<br>5. Diploma after O'level<br>6. Diploma after A level<br>7. University | <b>Codes D</b><br>0. None<br>1. Farming (Crop+Livestock)<br>2. Salaried employment<br>3. Retail business<br>4. Casual labourer on-farm<br>5. Casual labourer off-farm<br>6. School/college child | 7. Household chores<br>8. Handcraft/weaving<br>9. Other (Specify).....<br>.....<br>..... |
|------------------------------------------------------------------------------------------------------------------|-----------------------------------------------------------------------------------------------------|----------------------------------------------------------------------------------------------------------------------------------------------------------------------|--------------------------------------------------------------------------------------------------------------------------------------------------------------------|--------------------------------------------------------------------------------------------------------------------------------------------------------------------------------------------------|------------------------------------------------------------------------------------------|

### Part C: Crop production constraints

What are your **main** problems in the production and marketing of the potato, sweetpotato, banana and cassava?

Give scores (3=most important, 2=moderate, 1=very little importance, 0=not a problem)

| Production, marketing and other factors          | Score (potato) | Score (sweetpotato) | Score (banana) | Score (cassava) |
|--------------------------------------------------|----------------|---------------------|----------------|-----------------|
| Insect pests                                     |                |                     |                |                 |
| Diseases                                         |                |                     |                |                 |
| Nematodes                                        |                |                     |                |                 |
| Weeds                                            |                |                     |                |                 |
| Low soil fertility                               |                |                     |                |                 |
| Poor quality planting material                   |                |                     |                |                 |
| Drought (unpredictable rainfall)                 |                |                     |                |                 |
| High cost of planting material                   |                |                     |                |                 |
| High cost of fungicides                          |                |                     |                |                 |
| High cost of insecticides                        |                |                     |                |                 |
| High cost of fertilizers                         |                |                     |                |                 |
| Low market prices                                |                |                     |                |                 |
| High cost of transport                           |                |                     |                |                 |
| High cost of Nematicide                          |                |                     |                |                 |
| High cost of herbicides (weed control)           |                |                     |                |                 |
| Exploitation by brokers                          |                |                     |                |                 |
| Short shelf life (perishability)                 |                |                     |                |                 |
| Floods/mud slides/ soil erosion                  |                |                     |                |                 |
| Vertebrate pests (wild & domestic animals, rats) |                |                     |                |                 |
| Invertebrate pests (millipedes, nematodes)       |                |                     |                |                 |
|                                                  |                |                     |                |                 |
|                                                  |                |                     |                |                 |
|                                                  |                |                     |                |                 |

**Part D: Farmers knowledge of insect pests of potato, sweetpotato, banana and cassava**

Do you know of any insect pest which attack **potato, sweetpotato, banana and cassava**? If yes, give pest name, appearance & type of damage

| Crop               | No | Insect pest (Local name) | Insect pest (English name) | Description of pest features | Type of damage caused |
|--------------------|----|--------------------------|----------------------------|------------------------------|-----------------------|
| <b>Potato</b>      | 1  |                          |                            |                              |                       |
|                    | 2  |                          |                            |                              |                       |
|                    | 3  |                          |                            |                              |                       |
|                    | 4  |                          |                            |                              |                       |
|                    | 5  |                          |                            |                              |                       |
| <b>Sweetpotato</b> | 1  |                          |                            |                              |                       |
|                    | 2  |                          |                            |                              |                       |
|                    | 3  |                          |                            |                              |                       |
|                    | 4  |                          |                            |                              |                       |
|                    | 5  |                          |                            |                              |                       |
| <b>Banana</b>      | 1  |                          |                            |                              |                       |
|                    | 2  |                          |                            |                              |                       |
|                    | 3  |                          |                            |                              |                       |
|                    | 4  |                          |                            |                              |                       |
|                    | 5  |                          |                            |                              |                       |
| <b>Cassava</b>     | 1  |                          |                            |                              |                       |
|                    | 2  |                          |                            |                              |                       |
|                    | 3  |                          |                            |                              |                       |
|                    | 4  |                          |                            |                              |                       |
|                    | 5  |                          |                            |                              |                       |

Can you identify any of these insect pests? Show the farmer pictures or preserved samples of insects and related damage

| <b>Crop</b>        | <b>Insect pest</b>     | <b>Insect pest (local name)</b> | <b>Damage level</b><br>(3.Very severe, 2.Moderate, 1.Very low) |
|--------------------|------------------------|---------------------------------|----------------------------------------------------------------|
| <b>Potato</b>      | Potato tuber moth/     |                                 |                                                                |
|                    | Leaf miner fly         |                                 |                                                                |
|                    | Aphids                 |                                 |                                                                |
|                    | Cutworm                |                                 |                                                                |
|                    | Whiteflies             |                                 |                                                                |
|                    | Ants (wire, fire, red) |                                 |                                                                |
|                    | Other (Specify)        |                                 |                                                                |
| <b>Sweetpotato</b> | Sweetpotato weevils    |                                 |                                                                |
|                    | Sweetpotato butterfly  |                                 |                                                                |
|                    | Sweetpotato armyworm   |                                 |                                                                |
|                    | Sweetpotato hornworm   |                                 |                                                                |
|                    | Whiteflies             |                                 |                                                                |
|                    | Clear wing moth        |                                 |                                                                |
|                    | Other (Specify)        |                                 |                                                                |
| <b>Banana</b>      | Banana weevil          |                                 |                                                                |
|                    | Banana nematodes       |                                 |                                                                |
|                    | Other (Specify)        |                                 |                                                                |
|                    |                        |                                 |                                                                |
|                    |                        |                                 |                                                                |
| <b>Cassava</b>     | Whiteflies             |                                 |                                                                |
|                    | Green mites            |                                 |                                                                |
|                    | Aphids                 |                                 |                                                                |
|                    | Mealybugs              |                                 |                                                                |
|                    | Other (Specify)        |                                 |                                                                |

# Part E: Farmers knowledge of diseases of potato, sweetpotato, banana and cassava

Do you know of any disease which attack **potato, sweetpotato, banana and cassava**? If yes, give disease name and sign

| Crop               | No | Disease (English name) | Disease (Local name) | Type of damage caused to the plant (sign) |
|--------------------|----|------------------------|----------------------|-------------------------------------------|
| <b>Potato</b>      | 1  |                        |                      |                                           |
|                    | 2  |                        |                      |                                           |
|                    | 3  |                        |                      |                                           |
|                    | 4  |                        |                      |                                           |
|                    | 5  |                        |                      |                                           |
| <b>Sweetpotato</b> | 1  |                        |                      |                                           |
|                    | 2  |                        |                      |                                           |
|                    | 3  |                        |                      |                                           |
|                    | 4  |                        |                      |                                           |
|                    | 5  |                        |                      |                                           |
| <b>Banana</b>      | 1  |                        |                      |                                           |
|                    | 2  |                        |                      |                                           |
|                    | 3  |                        |                      |                                           |
|                    | 4  |                        |                      |                                           |
|                    | 5  |                        |                      |                                           |
| <b>Cassava</b>     | 1  |                        |                      |                                           |
|                    | 2  |                        |                      |                                           |
|                    | 3  |                        |                      |                                           |
|                    | 4  |                        |                      |                                           |
|                    | 5  |                        |                      |                                           |

Can you identify any of these diseases? Show the farmer pictures of disease signs

| Crop               | Disease (English name)                    | Disease (local name) | Damage level (3.Very severe, 2.Moderate, 1.Very low) |
|--------------------|-------------------------------------------|----------------------|------------------------------------------------------|
| <b>Potato</b>      | Bacterial wilt                            |                      |                                                      |
|                    | Late blight                               |                      |                                                      |
|                    | Early blight                              |                      |                                                      |
|                    | Viral diseases                            |                      |                                                      |
|                    | Fusarium wilt                             |                      |                                                      |
|                    |                                           |                      |                                                      |
|                    | Other (Specify)                           |                      |                                                      |
| <b>sweetpotato</b> | Sweetpotato virus disease (SPVD)          |                      |                                                      |
|                    | Alternaria leaf blight                    |                      |                                                      |
|                    | Root rots                                 |                      |                                                      |
|                    |                                           |                      |                                                      |
|                    | Other (Specify)                           |                      |                                                      |
|                    | Other (Specify)                           |                      |                                                      |
| <b>Banana</b>      | Banana bacterial wilt                     |                      |                                                      |
|                    | Fusarium wilt                             |                      |                                                      |
|                    | Bunchy top disease                        |                      |                                                      |
|                    | Black sigatoka disease                    |                      |                                                      |
|                    |                                           |                      |                                                      |
|                    |                                           |                      |                                                      |
|                    | Other (Specify)                           |                      |                                                      |
| <b>Cassava</b>     | Cassava mosaic disease (CMD)              |                      |                                                      |
|                    | Cassava brown streak virus disease (CBSD) |                      |                                                      |
|                    | Cassava bacterial blight (CBB)            |                      |                                                      |
|                    |                                           |                      |                                                      |
|                    |                                           |                      |                                                      |
|                    | Other (Specify)                           |                      |                                                      |

## Part F: Pest and disease management in potato

Which of the following control measures do you use in pest management?

| Crop   | Control method                                  | Used<br>(Yes/No) | Product<br>name<br>(Read it from the<br>pesticide<br>container) | Active<br>Ingredient<br>(Read it from the<br>pesticide container) | Target pest<br>or disease | Application<br>freq. per<br>season (Min &<br>Max times, give<br>range) | Quantity<br>(mls/kg<br>per<br>Knapsack) | Knap-<br>sack<br>size<br>(L) | Area<br>sprayed<br>(s) |
|--------|-------------------------------------------------|------------------|-----------------------------------------------------------------|-------------------------------------------------------------------|---------------------------|------------------------------------------------------------------------|-----------------------------------------|------------------------------|------------------------|
| Potato | Chemical insecticides                           |                  | 1.                                                              |                                                                   |                           |                                                                        |                                         |                              |                        |
|        |                                                 |                  | 2.                                                              |                                                                   |                           |                                                                        |                                         |                              |                        |
|        | Chemical fungicides                             |                  | 1.                                                              |                                                                   |                           |                                                                        |                                         |                              |                        |
|        |                                                 |                  | 2.                                                              |                                                                   |                           |                                                                        |                                         |                              |                        |
|        | Chemical herbicides                             |                  | 1.                                                              |                                                                   |                           |                                                                        |                                         |                              |                        |
|        |                                                 |                  | 2.                                                              |                                                                   |                           |                                                                        |                                         |                              |                        |
|        | Cultural                                        |                  |                                                                 |                                                                   |                           |                                                                        |                                         |                              |                        |
|        | uprooting/burning<br>infested/ infected plants, |                  |                                                                 |                                                                   |                           |                                                                        |                                         |                              |                        |
|        | clean seed,                                     |                  |                                                                 |                                                                   |                           |                                                                        |                                         |                              |                        |
|        | crop rotation,                                  |                  |                                                                 |                                                                   |                           |                                                                        |                                         |                              |                        |
|        | intercropping,                                  |                  |                                                                 |                                                                   |                           |                                                                        |                                         |                              |                        |
|        | early planting,                                 |                  |                                                                 |                                                                   |                           |                                                                        |                                         |                              |                        |
|        | early harvesting                                |                  |                                                                 |                                                                   |                           |                                                                        |                                         |                              |                        |
|        | Botanicals/Bio-control<br>(natural enemies)     |                  |                                                                 |                                                                   |                           |                                                                        |                                         |                              |                        |
|        | Resistant varieties                             |                  | 1.                                                              |                                                                   |                           |                                                                        |                                         |                              |                        |
|        |                                                 |                  | 2.                                                              |                                                                   |                           |                                                                        |                                         |                              |                        |
|        | Physical control (traps)                        |                  |                                                                 |                                                                   |                           |                                                                        |                                         |                              |                        |
|        | Mechanical control (hand<br>picking)            |                  |                                                                 |                                                                   |                           |                                                                        |                                         |                              |                        |
|        | None (Doesn't control)                          |                  |                                                                 |                                                                   |                           |                                                                        |                                         |                              |                        |
|        | Other (specify)                                 |                  |                                                                 |                                                                   |                           |                                                                        |                                         |                              |                        |
|        | Other                                           |                  |                                                                 |                                                                   |                           |                                                                        |                                         |                              |                        |
|        |                                                 |                  |                                                                 |                                                                   |                           |                                                                        |                                         |                              |                        |

| Crop        | Control method                                  | Used<br>(Yes/No) | Product<br>name<br>(Read it from the<br>pesticide<br>container) | Active<br>Ingredient<br>(Read it from the<br>pesticide container) | Target pest<br>or disease | Application<br>freq. per<br>season (Min &<br>Max times, give<br>range) | Quantity<br>(mls/kg<br>per<br>Knapsack) | Knapsack<br>size<br>(L) | Area<br>sprayed<br>(s) |
|-------------|-------------------------------------------------|------------------|-----------------------------------------------------------------|-------------------------------------------------------------------|---------------------------|------------------------------------------------------------------------|-----------------------------------------|-------------------------|------------------------|
| Sweetpotato | Chemical insecticides                           |                  | 1.                                                              |                                                                   |                           |                                                                        |                                         |                         |                        |
|             |                                                 |                  | 2.                                                              |                                                                   |                           |                                                                        |                                         |                         |                        |
|             | Chemical fungicides                             |                  | 1.                                                              |                                                                   |                           |                                                                        |                                         |                         |                        |
|             |                                                 |                  | 2.                                                              |                                                                   |                           |                                                                        |                                         |                         |                        |
|             | Chemical herbicides                             |                  | 1.                                                              |                                                                   |                           |                                                                        |                                         |                         |                        |
|             |                                                 |                  | 2.                                                              |                                                                   |                           |                                                                        |                                         |                         |                        |
|             | Cultural (specify)                              |                  |                                                                 |                                                                   |                           |                                                                        |                                         |                         |                        |
|             | uprooting/burning<br>infested/ infected plants, |                  |                                                                 |                                                                   |                           |                                                                        |                                         |                         |                        |
|             | clean vines,                                    |                  |                                                                 |                                                                   |                           |                                                                        |                                         |                         |                        |
|             | crop rotation,                                  |                  |                                                                 |                                                                   |                           |                                                                        |                                         |                         |                        |
|             | intercropping,                                  |                  |                                                                 |                                                                   |                           |                                                                        |                                         |                         |                        |
|             | early planting,                                 |                  |                                                                 |                                                                   |                           |                                                                        |                                         |                         |                        |
|             | early harvesting)                               |                  |                                                                 |                                                                   |                           |                                                                        |                                         |                         |                        |
|             | Botanicals/Bio-control<br>(natural enemies)     |                  |                                                                 |                                                                   |                           |                                                                        |                                         |                         |                        |
|             | Resistant varieties                             |                  | 1.                                                              |                                                                   |                           |                                                                        |                                         |                         |                        |
|             |                                                 |                  | 2.                                                              |                                                                   |                           |                                                                        |                                         |                         |                        |
|             | Physical control (traps)                        |                  |                                                                 |                                                                   |                           |                                                                        |                                         |                         |                        |
|             | Mechanical control (hand<br>picking)            |                  |                                                                 |                                                                   |                           |                                                                        |                                         |                         |                        |
|             | None (Doesn't control)                          |                  |                                                                 |                                                                   |                           |                                                                        |                                         |                         |                        |
|             | Other (specify)                                 |                  |                                                                 |                                                                   |                           |                                                                        |                                         |                         |                        |
|             | Other                                           |                  |                                                                 |                                                                   |                           |                                                                        |                                         |                         |                        |
| Banana      | Chemical insecticides                           |                  | 1.                                                              |                                                                   |                           |                                                                        |                                         |                         |                        |
|             |                                                 |                  | 2.                                                              |                                                                   |                           |                                                                        |                                         |                         |                        |
|             | Chemical fungicides                             |                  | 1.                                                              |                                                                   |                           |                                                                        |                                         |                         |                        |
|             |                                                 |                  | 2.                                                              |                                                                   |                           |                                                                        |                                         |                         |                        |
|             | Chemical herbicides                             |                  | 1.                                                              |                                                                   |                           |                                                                        |                                         |                         |                        |



| Crop    | Control method                                  | Used<br>(Yes/No) | Product<br>name<br>(Read it from the<br>pesticide<br>container) | Active<br>Ingredient<br>(Read it from the<br>pesticide container) | Target pest<br>or disease | Application<br>freq. per<br>season (Min &<br>Max times, give<br>range) | Quantity<br>(mls/kg<br>per<br>Knapsack) | Knap-<br>sack<br>size<br>(L) | Area<br>sprayed<br>(s) |
|---------|-------------------------------------------------|------------------|-----------------------------------------------------------------|-------------------------------------------------------------------|---------------------------|------------------------------------------------------------------------|-----------------------------------------|------------------------------|------------------------|
|         |                                                 |                  | 2.                                                              |                                                                   |                           |                                                                        |                                         |                              |                        |
|         | Cultural                                        |                  |                                                                 |                                                                   |                           |                                                                        |                                         |                              |                        |
|         | uprooting/burning<br>infested/ infected plants, |                  |                                                                 |                                                                   |                           |                                                                        |                                         |                              |                        |
|         | clean suckers,                                  |                  |                                                                 |                                                                   |                           |                                                                        |                                         |                              |                        |
|         | crop rotation,                                  |                  |                                                                 |                                                                   |                           |                                                                        |                                         |                              |                        |
|         | intercropping,                                  |                  |                                                                 |                                                                   |                           |                                                                        |                                         |                              |                        |
|         | early planting,                                 |                  |                                                                 |                                                                   |                           |                                                                        |                                         |                              |                        |
|         | early harvesting                                |                  |                                                                 |                                                                   |                           |                                                                        |                                         |                              |                        |
|         | Botanicals/Bio-control<br>(natural enemies)     |                  |                                                                 |                                                                   |                           |                                                                        |                                         |                              |                        |
|         | Resistant varieties                             |                  | 1.                                                              |                                                                   |                           |                                                                        |                                         |                              |                        |
|         |                                                 |                  | 2.                                                              |                                                                   |                           |                                                                        |                                         |                              |                        |
|         | Physical control (traps)                        |                  |                                                                 |                                                                   |                           |                                                                        |                                         |                              |                        |
|         | Mechanical control (hand<br>picking)            |                  |                                                                 |                                                                   |                           |                                                                        |                                         |                              |                        |
|         | None (Doesn't control)                          |                  |                                                                 |                                                                   |                           |                                                                        |                                         |                              |                        |
|         | Other (specify)                                 |                  |                                                                 |                                                                   |                           |                                                                        |                                         |                              |                        |
|         | Other                                           |                  |                                                                 |                                                                   |                           |                                                                        |                                         |                              |                        |
| Cassava | Chemical insecticides                           |                  | 1.                                                              |                                                                   |                           |                                                                        |                                         |                              |                        |
|         |                                                 |                  | 2.                                                              |                                                                   |                           |                                                                        |                                         |                              |                        |
|         | Chemical fungicides                             |                  | 1.                                                              |                                                                   |                           |                                                                        |                                         |                              |                        |
|         |                                                 |                  | 2.                                                              |                                                                   |                           |                                                                        |                                         |                              |                        |
|         | Chemical herbicides                             |                  | 1.                                                              |                                                                   |                           |                                                                        |                                         |                              |                        |
|         |                                                 |                  | 2.                                                              |                                                                   |                           |                                                                        |                                         |                              |                        |
|         | Cultural                                        |                  |                                                                 |                                                                   |                           |                                                                        |                                         |                              |                        |
|         | uprooting/burning<br>infested/ infected plants, |                  |                                                                 |                                                                   |                           |                                                                        |                                         |                              |                        |
|         | clean cuttings,                                 |                  |                                                                 |                                                                   |                           |                                                                        |                                         |                              |                        |
|         | crop rotation,                                  |                  |                                                                 |                                                                   |                           |                                                                        |                                         |                              |                        |

| Crop | Control method                              | Used<br>(Yes/No) | Product<br>name<br>(Read it from the<br>pesticide<br>container) | Active<br>Ingredient<br>(Read it from the<br>pesticide container) | Target pest<br>or disease | Application<br>freq. per<br>season (Min &<br>Max times, give<br>range) | Quantity<br>(mls/kg<br>per<br>Knapsack) | Knapsack<br>size<br>(L) | Area<br>sprayed<br>(s) |
|------|---------------------------------------------|------------------|-----------------------------------------------------------------|-------------------------------------------------------------------|---------------------------|------------------------------------------------------------------------|-----------------------------------------|-------------------------|------------------------|
|      | intercropping,                              |                  |                                                                 |                                                                   |                           |                                                                        |                                         |                         |                        |
|      | delayed planting, early<br>planting,        |                  |                                                                 |                                                                   |                           |                                                                        |                                         |                         |                        |
|      | early harvesting)                           |                  |                                                                 |                                                                   |                           |                                                                        |                                         |                         |                        |
|      | Botanicals/Bio-control<br>(natural enemies) |                  |                                                                 |                                                                   |                           |                                                                        |                                         |                         |                        |
|      | Resistant varieties                         | 1.               |                                                                 |                                                                   |                           |                                                                        |                                         |                         |                        |
|      |                                             | 2.               |                                                                 |                                                                   |                           |                                                                        |                                         |                         |                        |
|      | Physical control (traps)                    |                  |                                                                 |                                                                   |                           |                                                                        |                                         |                         |                        |
|      | Mechanical control (hand<br>picking)        |                  |                                                                 |                                                                   |                           |                                                                        |                                         |                         |                        |
|      | None (Doesn't control)                      |                  |                                                                 |                                                                   |                           |                                                                        |                                         |                         |                        |
|      | Other                                       |                  |                                                                 |                                                                   |                           |                                                                        |                                         |                         |                        |

Do you know of any natural enemies (parasitoids or predators) of insect pests?.....If yes, give name of enemy & pest .....

How do you dispose-off infested and/or infected tubers, roots, plants?.....1. Leave them in the field 2. Burn/Bury/roadside/river 3. Feeds the animals 4.....

Do you have pests problems in potato storage?.....If yes, what kind of pests and damage?.....

What are the losses due to pest problems (give % damage)?.....

Do you apply chemical pesticides in **potato** storage?.....If yes, name the chemical used.....

Have you ever heard of integrated pest management (IPM)?..... If yes, what do you know about IPM?

.....

.....

**Part G: Impact of pests and diseases on potato production, processing, marketing and consumption**

Please state the crop losses in yield, quality, trade you made in the previous harvest (1<sup>st</sup> cropping season) due to pests and diseases

| Crop        | Size of field (ares ) | Actual yield (bags or Kg) | Expected yield (bags or Kg) | Quantity lost (bags or Kg) | Monetary Loss (RWF/BIF) |
|-------------|-----------------------|---------------------------|-----------------------------|----------------------------|-------------------------|
| Potato      |                       |                           |                             |                            |                         |
|             |                       |                           |                             |                            |                         |
|             |                       |                           |                             |                            |                         |
|             |                       |                           |                             |                            |                         |
| Sweetpotato |                       |                           |                             |                            |                         |
|             |                       |                           |                             |                            |                         |
|             |                       |                           |                             |                            |                         |
|             |                       |                           |                             |                            |                         |
| Banana      |                       |                           |                             |                            |                         |
|             |                       |                           |                             |                            |                         |
|             |                       |                           |                             |                            |                         |
|             |                       |                           |                             |                            |                         |
| Cassava     |                       |                           |                             |                            |                         |
|             |                       |                           |                             |                            |                         |
|             |                       |                           |                             |                            |                         |
|             |                       |                           |                             |                            |                         |

## Part H: Impact of pest and diseases on household food security

Please answer the following questions if they applied to your household in the last 12 months

|    | Statement                                                                                                                   | TRUE | FALSE |
|----|-----------------------------------------------------------------------------------------------------------------------------|------|-------|
| 1  | Pest and disease damage deprived my family members of enough/required food to eat throughout the year                       |      |       |
| 2  | Pest and disease damage caused food to be very expensive/unaffordable for my family members throughout the year             |      |       |
| 3  | Someone of my family members fell sick as a result of using pesticides                                                      |      |       |
| 4  | I have always sold my <b>potatoes</b> at a reduced price (below market value) due to pest or disease damage                 |      |       |
| 5  | I have always sold my <b>sweetpotatoes</b> at a reduced price (below market value) due to pest or disease damage            |      |       |
| 6  | I have always sold my <b>bananas</b> at a reduced price (below market value) due to pest or disease damage                  |      |       |
| 7  | I have always sold my <b>cassava</b> at a reduced price (below market value) due to pest or disease damage                  |      |       |
| 8  | I didn't dispose of any <b>potatoes</b> when they became rotten/stale/ unfit for human consumption                          |      |       |
| 9  | I didn't dispose of any <b>sweetpotatoes</b> when they became rotten/stale/ unfit for human consumption                     |      |       |
| 10 | I didn't dispose of any <b>bananas</b> when they became rotten/stale/ unfit for human consumption                           |      |       |
| 11 | I didn't dispose of any <b>cassava</b> when they became rotten/stale/ unfit for human consumption                           |      |       |
| 12 | Have you stopped growing any variety of <b>potato</b> because it is very susceptible to pests and/or diseases               |      |       |
| 13 | Have you stopped growing any variety of <b>sweetpotato</b> because it is very susceptible to pests and/or diseases          |      |       |
| 14 | Have you stopped growing any variety of <b>banana</b> because it is very susceptible to pests and/or diseases               |      |       |
| 15 | Have you stopped growing any variety of <b>cassava</b> because it is very susceptible to pests and/or diseases              |      |       |
| 16 | Has there been any new outbreak of a pest or disease of <b>potato</b> in the last 10 years?                                 |      |       |
| 17 | Has there been any new outbreak of a pest or disease of <b>sweetpotato</b> in the last 10 years?                            |      |       |
| 18 | Has there been any new outbreak of a pest or disease of <b>banana</b> in the last 10 years?                                 |      |       |
| 19 | Has there been any new outbreak of a pest or disease of <b>cassava</b> in the last 10 years?                                |      |       |
| 20 | I didn't plant at all any <b>potatoes</b> in the subsequent season following serious crop damage by pests and diseases      |      |       |
| 21 | I didn't plant at all any <b>sweetpotatoes</b> in the subsequent season following serious crop damage by pests and diseases |      |       |
| 22 | I didn't plant at all any <b>bananas</b> in the subsequent season following serious crop damage by pests and diseases       |      |       |
| 23 | I didn't plant at all any <b>cassava</b> in the subsequent season following serious crop damage by pests and diseases       |      |       |
| 24 | I planted less quantity of <b>potato</b> because pest and disease damaged most of my <b>seed potato</b>                     |      |       |
| 25 | I planted less quantity of <b>sweetpotato</b> because pest and disease damaged most of my <b>sweetpotato</b> vines          |      |       |
| 26 | I planted less quantity of <b>banana</b> because pest and disease damaged most of my bananas                                |      |       |
| 27 | I planted less quantity of <b>cassava</b> because pest and disease damaged most of my <b>cassava</b>                        |      |       |
| 28 | I grow <b>potatoes</b> primarily for home use (food)                                                                        |      |       |
| 29 | I grow <b>sweetpotatoes</b> primarily for home use (food)                                                                   |      |       |
| 30 | I grow <b>banana</b> primarily for home use (food)                                                                          |      |       |
| 31 | I grow <b>cassava</b> primarily for home use (food)                                                                         |      |       |

## Part I: Pesticide use and handling

How do you avoid contact with pesticides during application?

| Protective gear | Yes/No | Precaution              | Yes/No | Precaution                            | Yes/No |
|-----------------|--------|-------------------------|--------|---------------------------------------|--------|
| Wear gloves     |        | Wear face and nose mask |        | Take a bath after spraying            |        |
| Wear gumboots   |        | Wear long sleeved shirt |        | Observe wind direction while spraying |        |
| Wear a hat      |        | Wear waterproof jacket  |        | Use a knapsack sprayer                |        |
| Wear goggles    |        | Wear waterproof pants   |        | Other (specify)                       |        |

If none, why don't you apply any preventive measure?.....

Have you experienced any of the following after pesticide applications?

| Effect         | Yes/No | Effect                 | Yes/No | Effect                     | Yes/No | Effect            | Yes/No | Effect        | Yes/No |
|----------------|--------|------------------------|--------|----------------------------|--------|-------------------|--------|---------------|--------|
| Skin itching   |        | Coughing               |        | Dizziness                  |        | Stomach ache      |        | Tears         |        |
| Skin burning   |        | Flu                    |        | Headache                   |        | Excess salivation |        | Burning eyes  |        |
| Heavy sweating |        | Breathing difficulties |        | Death of domestic animal   |        | Nausea            |        | Blurry vision |        |
|                |        |                        |        | Human death/self-poisoning |        | Vomiting          |        | Reddened eyes |        |

Can you tell how much money you have spent on treatment of pesticide poisoning related sickness in the last 12 months?.....RWF/BIF

Where did you buy the chemical pesticides (insecticides+fungicides)? ....1. Agro vet shops 2. General merchandise shops 3. Weekly market 4. other.....

What is the pack size (Litres or Kg) of pesticides you bought in the last season (i) Smallest pack..... largest

pack/vol.....Kg or L

For how many years have you been applying pesticides in **potato** fields? .....Has the frequency of pesticide application increased in the last 10 years?.....

For how many years have you been applying pesticides in **potato** stores? .....Has the frequency of pesticide application increased in the last 10 years?.....

For how many years have you been applying pesticides in **sweetpotato** fields? .....Has the frequency of pesticide application increased in the last 10 years?.....

For how many years have you been applying pesticides in **banana** plantations? .....Has the frequency of pesticide application increased in the last 10 years?.....

For how many years have you been applying pesticides in **cassava** fields? .....Has the frequency of pesticide application increased in the last 10 years?.....

How do you know which pesticide to buy or apply?.....(1.Seller 2.Another farmer 3. Own experience 4. Other.....)

How do you know the doses of pesticides to use?..... (1.Seller 2.Another farmer 3. Can read 4. Other.....)

Do you follow a fixed timetable to apply pesticides.....or do you only spray AFTER you have seen pest damage or disease signs?.....

Were pesticide sold in labelled containers?.....If yes did you read and understand the pesticide label?.....

Do you know how to tell the toxicity level of a pesticide from its label?.....If yes, let the farmer show you the sign on the container

Do you know any negative effect resulting from pesticide use on the environment?.....If yes, mention the effects ...

.....  
.....

Do you have knowledge about other methods of pest control?.....

.....

## Part J: Social Capital and Networking

Have any member of your HH been involved in formal and/or farmer organizations in the last 3 years?.....

| Family code<br>(See Part A) | Type of<br>group:<br><b>Codes A</b> | Three most important group functions: <b>Codes B</b> |                 |     |
|-----------------------------|-------------------------------------|------------------------------------------------------|-----------------|-----|
|                             |                                     | 1 <sup>st</sup>                                      | 2 <sup>nd</sup> | 3rd |
|                             |                                     |                                                      |                 |     |
|                             |                                     |                                                      |                 |     |

|                                                                                                                       |                                                                                               |                                                                                  |                                                                                |                                                                      |
|-----------------------------------------------------------------------------------------------------------------------|-----------------------------------------------------------------------------------------------|----------------------------------------------------------------------------------|--------------------------------------------------------------------------------|----------------------------------------------------------------------|
| <b>Codes A</b><br>1. Farmers' cooperative/union<br>2. Farmers' village group<br>3. Faith based organization<br>4. NGO | <b>Codes A</b><br>5. Women's Association<br>6. Savings and Credit group<br>7. Other (Specify) | <b>Codes B</b><br>1. Produce marketing<br>2. Input supply<br>3. Savings & Credit | <b>Codes B</b><br>4. Credit provision<br>5. Labour sharing<br>6. Tree planting | <b>Codes B</b><br>7. Soil & water conservation<br>8. Other (Specify) |
|-----------------------------------------------------------------------------------------------------------------------|-----------------------------------------------------------------------------------------------|----------------------------------------------------------------------------------|--------------------------------------------------------------------------------|----------------------------------------------------------------------|

## Part K: Crop production techniques and productivity

How much land do you own in ares?.....

| Total land cropped (ares)        | Owned land<br>(ares) | Owner<br>(Family code) | Borrowed<br>land (ares) | Owner<br>(Family code) | Rented land<br>(ares) | Owner<br>(Family code) | . |
|----------------------------------|----------------------|------------------------|-------------------------|------------------------|-----------------------|------------------------|---|
| 1 <sup>st</sup> Season (Mar-Jul) |                      |                        |                         |                        |                       |                        |   |
| 2 <sup>nd</sup> Season (Aug-Dec) |                      |                        |                         |                        |                       |                        |   |

Which crops did you grow on your farm in the 1<sup>st</sup> and 2<sup>nd</sup> season? (Begin with crops planted on the largest area)

| Season 1 |                     |                          | Season 2 |                     |                          |
|----------|---------------------|--------------------------|----------|---------------------|--------------------------|
| Crop     | Planted area (ares) | Crop owner (family code) | Crop     | Planted area (ares) | Crop owner (family code) |
|          |                     |                          |          |                     |                          |
|          |                     |                          |          |                     |                          |
|          |                     |                          |          |                     |                          |
|          |                     |                          |          |                     |                          |
|          |                     |                          |          |                     |                          |
|          |                     |                          |          |                     |                          |
|          |                     |                          |          |                     |                          |
|          |                     |                          |          |                     |                          |

Do you intercrop **potato**?..... If yes, with which crops?.....

Do you intercrop **sweetpotato**?..... If yes, with which crops?.....

Do you intercrop **banana**?..... If yes, with which crops?.....

Do you intercrop **cassava**?..... If yes, with which crops?.....

For how many years have you been growing **potato**? Man (Husband).....Woman (Wife).....

For how many years have you been growing **sweetpotato**? Man (Husband).....Woman (Wife).....

For how many years have you been growing **banana**? Man (Husband).....Woman (Wife).....

For how many years have you been growing **cassava**? Man (Husband).....Woman (Wife).....

How many varieties of **potato** did you plant in the 1<sup>st</sup> season.....and 2<sup>nd</sup> season.....

How many varieties of **sweetpotato** did you plant in the 1<sup>st</sup> season.....and 2<sup>nd</sup> season.....

How many varieties of **banana** are in the different plots? Plot 1.....Plot 2.....plot 3.....Plot 4.....

How many varieties of **cassava** did you plant in the 1<sup>st</sup> season.....and 2<sup>nd</sup> season.....



For the last season, please state the following for **potato**

| Name of potato variety | Planted area (ares) | Field owner (family code) | Source of seed (codes A)<br>if more than one source, please specify percentage from each source | Quantity of seed (Kg or bags)<br>if more than one source, please specify how much per source | Cost of 100kg seed (for each type of seed source) | Yield (Kg or bags) | Quantity sold (Kg or bags) | Price per bag (RWF/BIF) | Quantity used for food (Kg or bags) | Quantity kept for seed (Kg or bags) |
|------------------------|---------------------|---------------------------|-------------------------------------------------------------------------------------------------|----------------------------------------------------------------------------------------------|---------------------------------------------------|--------------------|----------------------------|-------------------------|-------------------------------------|-------------------------------------|
|                        |                     |                           |                                                                                                 |                                                                                              |                                                   |                    |                            |                         |                                     |                                     |
|                        |                     |                           |                                                                                                 |                                                                                              |                                                   |                    |                            |                         |                                     |                                     |
|                        |                     |                           |                                                                                                 |                                                                                              |                                                   |                    |                            |                         |                                     |                                     |
|                        |                     |                           |                                                                                                 |                                                                                              |                                                   |                    |                            |                         |                                     |                                     |
|                        |                     |                           |                                                                                                 |                                                                                              |                                                   |                    |                            |                         |                                     |                                     |

|                                    |                                                  |                                                   |                                 |
|------------------------------------|--------------------------------------------------|---------------------------------------------------|---------------------------------|
| Codes A<br>1. Govt Agric Extension | 2. Own seed saved from previous season<br>3. NGO | 4. Agric research org (NARO)<br>5. Another farmer | 6. Agro-dealer<br>7. other..... |
|------------------------------------|--------------------------------------------------|---------------------------------------------------|---------------------------------|

For the last season, please state the following for **sweetpotato**

| Name of sweetpotato variety | Planted area (in ares) | Field owner (family code) | Source of vines (codes A)<br>if more than one source, please specify percentage from each source | Quantity of vines (bags)<br>if more than one source, please specify how much per source | Cost of 100kg bag (RWF/BIF) | Yield (Kg or bags) | Quantity sold (Kg or bags) | Price per bag (RWF/BIF) | Quantity used for food (Kg or bags) | Quantity kept for seed (Kg or bags) |
|-----------------------------|------------------------|---------------------------|--------------------------------------------------------------------------------------------------|-----------------------------------------------------------------------------------------|-----------------------------|--------------------|----------------------------|-------------------------|-------------------------------------|-------------------------------------|
|                             |                        |                           |                                                                                                  |                                                                                         |                             |                    |                            |                         |                                     |                                     |
|                             |                        |                           |                                                                                                  |                                                                                         |                             |                    |                            |                         |                                     |                                     |
|                             |                        |                           |                                                                                                  |                                                                                         |                             |                    |                            |                         |                                     |                                     |
|                             |                        |                           |                                                                                                  |                                                                                         |                             |                    |                            |                         |                                     |                                     |
|                             |                        |                           |                                                                                                  |                                                                                         |                             |                    |                            |                         |                                     |                                     |

|                                    |                                                  |                                                   |                                 |
|------------------------------------|--------------------------------------------------|---------------------------------------------------|---------------------------------|
| Codes A<br>1. Govt agric Extension | 2. Own seed saved from previous season<br>3. NGO | 4. Agric research org (NARO)<br>5. Another farmer | 6. Agro-dealer<br>7. other..... |
|------------------------------------|--------------------------------------------------|---------------------------------------------------|---------------------------------|

For the last season, please state the following for **banana**

| Name of banana variety | Planted area (in ares) | Owner of the field (family code) | Source of suckers (codes A)<br>if more than one source, please specify percentage from each source | No. of suckers (if more than one source, please specify how much per source) | Cost of 1 sucker (RWF/BIF) | Yield (Kg/ bunches) | Quantity sold (Kg or bunches) | Price per bunch/kg | Quantity used for food (Kg or bags) | Quantity kept for seed (Kg or bags) |
|------------------------|------------------------|----------------------------------|----------------------------------------------------------------------------------------------------|------------------------------------------------------------------------------|----------------------------|---------------------|-------------------------------|--------------------|-------------------------------------|-------------------------------------|
|                        |                        |                                  |                                                                                                    |                                                                              |                            |                     |                               |                    |                                     |                                     |
|                        |                        |                                  |                                                                                                    |                                                                              |                            |                     |                               |                    |                                     |                                     |
|                        |                        |                                  |                                                                                                    |                                                                              |                            |                     |                               |                    |                                     |                                     |
|                        |                        |                                  |                                                                                                    |                                                                              |                            |                     |                               |                    |                                     |                                     |
|                        |                        |                                  |                                                                                                    |                                                                              |                            |                     |                               |                    |                                     |                                     |

|                                   |                                                |                                                 |                                 |
|-----------------------------------|------------------------------------------------|-------------------------------------------------|---------------------------------|
| Codes A<br>1.Govt Agric Extension | 2.Own seed saved from previous season<br>3.NGO | 4.Agric research org (NARO)<br>5.Another farmer | 6. Agro-dealer<br>7. other..... |
|-----------------------------------|------------------------------------------------|-------------------------------------------------|---------------------------------|

For the last season, please state the following for **cassava**

| Name of cassava variety | Planted area (in ares) | Owner of the field (family code) | Source of cuttings (codes A)<br>if more than one source, please specify percentage from each source | Quantity of cuttings (bags)<br>if more than one source, please specify how much per source | Cost of 100kg seed (RWF/BIF) | Yield (Kg or bags) | Quantity sold (Kg or bags) | Price per bag | Quantity used for food (Kg or bags) | Quantity kept for seed (Kg or bags) |
|-------------------------|------------------------|----------------------------------|-----------------------------------------------------------------------------------------------------|--------------------------------------------------------------------------------------------|------------------------------|--------------------|----------------------------|---------------|-------------------------------------|-------------------------------------|
|                         |                        |                                  |                                                                                                     |                                                                                            |                              |                    |                            |               |                                     |                                     |
|                         |                        |                                  |                                                                                                     |                                                                                            |                              |                    |                            |               |                                     |                                     |
|                         |                        |                                  |                                                                                                     |                                                                                            |                              |                    |                            |               |                                     |                                     |

|                                   |                                                |                                                 |                                 |
|-----------------------------------|------------------------------------------------|-------------------------------------------------|---------------------------------|
| Codes A<br>1.Govt Agric Extension | 2.Own seed saved from previous season<br>3.NGO | 4.Agric research org (NARO)<br>5.Another farmer | 6. Agro-dealer<br>7. other..... |
|-----------------------------------|------------------------------------------------|-------------------------------------------------|---------------------------------|

Which of the following inputs do you use in **potato**? (DAP,NPK, UREA, Manure, Diathane, Ambush, Supergrow, Herbicides)

| Field size<br>(ares) | Fertilizer 1<br>..... |                       | Fertilizer 2<br>..... |                       | Organic manure<br>..... |                       | Insecticide 1<br>..... |                       | Insecticide 2<br>..... |                       | Fungicide 1<br>..... |                       | Fungicide 1<br>..... |                       | Others<br>..... |
|----------------------|-----------------------|-----------------------|-----------------------|-----------------------|-------------------------|-----------------------|------------------------|-----------------------|------------------------|-----------------------|----------------------|-----------------------|----------------------|-----------------------|-----------------|
|                      | Quantity<br>(kg)      | Cost<br>(RWF/<br>BIF) | Qty<br>(kg)           | Cost<br>(RWF/<br>BIF) | Qty (kg)                | Cost<br>(RWF/<br>BIF) | Vol. (L)               | Cost<br>(RWF/<br>BIF) | Vol. (L)               | Cost<br>(RWF/<br>BIF) | Qty<br>(kg)          | Cost<br>(RWF/<br>BIF) | Qty<br>(kg)          | Cost<br>(RWF/<br>BIF) |                 |
|                      |                       |                       |                       |                       |                         |                       |                        |                       |                        |                       |                      |                       |                      |                       |                 |
|                      |                       |                       |                       |                       |                         |                       |                        |                       |                        |                       |                      |                       |                      |                       |                 |
|                      |                       |                       |                       |                       |                         |                       |                        |                       |                        |                       |                      |                       |                      |                       |                 |

Which of the following inputs do you use in **sweetpotato**? (DAP,NPK, UREA, Manure, Diathane, Ambush, Supergrow, Herbicides)

| Field size<br>(ares) | Fertilizer 1<br>..... |                       | Fertilizer 2<br>..... |                   | Organic manure<br>..... |                   | Insecticide 1<br>..... |                   | Insecticide 2<br>..... |                   | Fungicide 1<br>..... |                   | Fungicide 1<br>..... |                   |
|----------------------|-----------------------|-----------------------|-----------------------|-------------------|-------------------------|-------------------|------------------------|-------------------|------------------------|-------------------|----------------------|-------------------|----------------------|-------------------|
|                      | Quantity<br>(kg)      | Cost<br>(RWF/<br>BIF) | Qty<br>(kg)           | Cost<br>(RWF/BIF) | Qty<br>(kg)             | Cost<br>(RWF/BIF) | Vol. (L)               | Cost<br>(RWF/BIF) | Vol.<br>(L)            | Cost<br>(RWF/BIF) | Qty<br>(kg)          | Cost<br>(RWF/BIF) | Qty<br>(kg)          | Cost<br>(RWF/BIF) |
|                      |                       |                       |                       |                   |                         |                   |                        |                   |                        |                   |                      |                   |                      |                   |
|                      |                       |                       |                       |                   |                         |                   |                        |                   |                        |                   |                      |                   |                      |                   |
|                      |                       |                       |                       |                   |                         |                   |                        |                   |                        |                   |                      |                   |                      |                   |

Which of the following inputs do you use in **banana**? (DAP,NPK, UREA, Manure, Diathane, Ambush, Supergrow, Herbicides)

| Field size<br>(ares) | Fertilizer 1<br>..... |                       | Fertilizer 2<br>..... |                   | Organic manure<br>..... |                   | Insecticide 1<br>..... |                   | Insecticide 2<br>..... |                   | Fungicide 1<br>..... |                   | Fungicide 1<br>..... |                   |
|----------------------|-----------------------|-----------------------|-----------------------|-------------------|-------------------------|-------------------|------------------------|-------------------|------------------------|-------------------|----------------------|-------------------|----------------------|-------------------|
|                      | Quantity<br>(kg)      | Cost<br>(RWF/<br>BIF) | Qty<br>(kg)           | Cost<br>(RWF/BIF) | Qty<br>(kg)             | Cost<br>(RWF/BIF) | Vol. (L)               | Cost<br>(RWF/BIF) | Vol.<br>(L)            | Cost<br>(RWF/BIF) | Qty<br>(kg)          | Cost<br>(RWF/BIF) | Qty<br>(kg)          | Cost<br>(RWF/BIF) |
|                      |                       |                       |                       |                   |                         |                   |                        |                   |                        |                   |                      |                   |                      |                   |
|                      |                       |                       |                       |                   |                         |                   |                        |                   |                        |                   |                      |                   |                      |                   |
|                      |                       |                       |                       |                   |                         |                   |                        |                   |                        |                   |                      |                   |                      |                   |

Which of the following inputs do you use in **cassava**? (DAP,NPK, UREA, Manure, Diathane, Ambush, Supergrow, Herbicides)

| Field size<br>(ares) | Fertilizer 1<br>..... |                       | Fertilizer 2<br>..... |                   | Organic manure<br>..... |                   | Insecticide 1<br>..... |                   | Insecticide 2<br>..... |                   | Fungicide 1<br>..... |                   | Fungicide 1<br>..... |                   |
|----------------------|-----------------------|-----------------------|-----------------------|-------------------|-------------------------|-------------------|------------------------|-------------------|------------------------|-------------------|----------------------|-------------------|----------------------|-------------------|
|                      | Quantity<br>(kg)      | Cost<br>(RWF/<br>BIF) | Qty<br>(kg)           | Cost<br>(RWF/BIF) | Qty<br>(kg)             | Cost<br>(RWF/BIF) | Vol. (L)               | Cost<br>(RWF/BIF) | Vol. (L)               | Cost<br>(RWF/BIF) | Qty<br>(kg)          | Cost<br>(RWF/BIF) | Qty<br>(kg)          | Cost<br>(RWF/BIF) |
|                      |                       |                       |                       |                   |                         |                   |                        |                   |                        |                   |                      |                   |                      |                   |
|                      |                       |                       |                       |                   |                         |                   |                        |                   |                        |                   |                      |                   |                      |                   |
|                      |                       |                       |                       |                   |                         |                   |                        |                   |                        |                   |                      |                   |                      |                   |

During the last cropping season, how much money did you spend on paying for labor for the following tasks in **potato** production?

| Field size<br>(ares) | Land<br>preparation | planting | weeding | chemical<br>application | harvesting | Selling/<br>transport | Fertilizer<br>application | Total labour cost<br>(RWF/BIF) |
|----------------------|---------------------|----------|---------|-------------------------|------------|-----------------------|---------------------------|--------------------------------|
|                      |                     |          |         |                         |            |                       |                           |                                |
|                      |                     |          |         |                         |            |                       |                           |                                |
|                      |                     |          |         |                         |            |                       |                           |                                |

During the last cropping season, how much money did you spend on paying for labor for the following tasks in **sweetpotato** production?

| Field size<br>(ares) | Land<br>preparation | planting | weeding | chemical<br>application | harvesting | Selling/<br>transport | Fertilizer<br>application | Total labour cost<br>(RWF/BIF) |
|----------------------|---------------------|----------|---------|-------------------------|------------|-----------------------|---------------------------|--------------------------------|
|                      |                     |          |         |                         |            |                       |                           |                                |
|                      |                     |          |         |                         |            |                       |                           |                                |
|                      |                     |          |         |                         |            |                       |                           |                                |

During the last cropping season, how much money did you spend on paying for labor for the following tasks in **banana** production?

| Field size (ares) | Land preparation | planting | weeding | chemical application | harvesting | Selling/transport | Fertilizer application | Total labour cost (RWF/BIF) |
|-------------------|------------------|----------|---------|----------------------|------------|-------------------|------------------------|-----------------------------|
|                   |                  |          |         |                      |            |                   |                        |                             |
|                   |                  |          |         |                      |            |                   |                        |                             |
|                   |                  |          |         |                      |            |                   |                        |                             |

During the last cropping season, how much money did you spend on paying for labor for the following tasks in **cassava** production?

| Field size (ares) | Land preparation | planting | weeding | chemical application | harvesting | Selling/transport | Fertilizer application | Total labour cost (RWF/BIF) |
|-------------------|------------------|----------|---------|----------------------|------------|-------------------|------------------------|-----------------------------|
|                   |                  |          |         |                      |            |                   |                        |                             |
|                   |                  |          |         |                      |            |                   |                        |                             |
|                   |                  |          |         |                      |            |                   |                        |                             |

#### Part L: Market participation and access

Is there ready market for your **potatoes** in your village? 1. Seed potato .....2. Ware potato.....

Is there ready market for your **sweetpotatoes** in your village? 1. Sweetpotato vines.....2. Sweetpotato roots.....

Is there ready market for your **bananas** in your village? 1. Banana suckers/ macro-propagated plantlets.....2. Banana bunches.....

Is there ready market for your **cassava** in your village? 1. Cassava cuttings.....2. Cassava roots.....

From your house, what is the distance to (i) the nearest market/store.....km (ii) main road.....km

Regarding planting material, fill the table below

|             | Season 1    |                                 |          |            |          |                     |            |               | Season 2    |                                 |          |            |          |                     |            |               |
|-------------|-------------|---------------------------------|----------|------------|----------|---------------------|------------|---------------|-------------|---------------------------------|----------|------------|----------|---------------------|------------|---------------|
| crop        | Seed source | Sold planting material (Yes/No) | Qty sold | Unit price | Who sold | Who controlled cash | Who bought | Place of sale | Seed source | Sold planting material (Yes/No) | Qty sold | Unit price | Who sold | Who controlled cash | Who bought | Place of sale |
| potato      |             |                                 |          |            |          |                     |            |               |             |                                 |          |            |          |                     |            |               |
| potato      |             |                                 |          |            |          |                     |            |               |             |                                 |          |            |          |                     |            |               |
| sweetpotato |             |                                 |          |            |          |                     |            |               |             |                                 |          |            |          |                     |            |               |
| sweetpotato |             |                                 |          |            |          |                     |            |               |             |                                 |          |            |          |                     |            |               |
| banana      |             |                                 |          |            |          |                     |            |               |             |                                 |          |            |          |                     |            |               |
| banana      |             |                                 |          |            |          |                     |            |               |             |                                 |          |            |          |                     |            |               |
| cassava     |             |                                 |          |            |          |                     |            |               |             |                                 |          |            |          |                     |            |               |
| cassava     |             |                                 |          |            |          |                     |            |               |             |                                 |          |            |          |                     |            |               |

Seed source: 1=own seed saved from previous harvest, 2=seed company 3=other farmer, 4=farmers' group, 5=Extension Agents, 6. Other (specify).....

Who in the family sold or controlled cash: 1. Husband 2.Wife

Who bought: 1.Farmers group, 2.Consumer 3.Broker 4.Seed company, 5.GOV'T AGRIC EXTENSION)

Place of sale: (1.Onfarm, 2.Village market/store, 3.Main/town market, 4.Other(specify).....

## Part M: Gender roles in crop production

Referring to the last cropping **YEAR**, who in the family decided or did the following activities regarding **potato**?

| Activity                        | Season 1                                |                                                            | Season 2                                |                                                            |
|---------------------------------|-----------------------------------------|------------------------------------------------------------|-----------------------------------------|------------------------------------------------------------|
|                                 | Who in the family decided (family code) | Who in the family worked or paid labor costs (family code) | Who in the family decided (family code) | Who in the family worked or paid labor costs (family code) |
| Land preparation                |                                         |                                                            |                                         |                                                            |
| Bought inputs                   |                                         |                                                            |                                         |                                                            |
| Selected the variety to plant   |                                         |                                                            |                                         |                                                            |
| Planted                         |                                         |                                                            |                                         |                                                            |
| Weeded                          |                                         |                                                            |                                         |                                                            |
| Applied Fungicides/insecticides |                                         |                                                            |                                         |                                                            |
| Harvested                       |                                         |                                                            |                                         |                                                            |
| Transported                     |                                         |                                                            |                                         |                                                            |
| Processed                       |                                         |                                                            |                                         |                                                            |
| Sold                            |                                         |                                                            |                                         |                                                            |

Referring to the last cropping **YEAR**, who in the family decided or did the following activities regarding **sweetpotato**?

| Activity                        | Season 1                  |                                           | Season 2                  |                                           |
|---------------------------------|---------------------------|-------------------------------------------|---------------------------|-------------------------------------------|
|                                 | Who in the family decided | Who in the family worked paid labor costs | Who in the family decided | Who in the family worked paid labor costs |
| Land preparation                |                           |                                           |                           |                                           |
| Bought inputs                   |                           |                                           |                           |                                           |
| Selected the variety to plant   |                           |                                           |                           |                                           |
| Planted                         |                           |                                           |                           |                                           |
| Weeded                          |                           |                                           |                           |                                           |
| Applied Fungicides/insecticides |                           |                                           |                           |                                           |
| Harvested                       |                           |                                           |                           |                                           |
| Transported                     |                           |                                           |                           |                                           |
| Processed                       |                           |                                           |                           |                                           |
| Sold                            |                           |                                           |                           |                                           |

Referring to the last cropping **YEAR**, who in the family decided or did the following activities regarding **banana**?

| Activity                                | Season 1                  |                                           | Season 2                  |                                           |
|-----------------------------------------|---------------------------|-------------------------------------------|---------------------------|-------------------------------------------|
|                                         | Who in the family decided | Who in the family worked paid labor costs | Who in the family decided | Who in the family worked paid labor costs |
| Land preparation                        |                           |                                           |                           |                                           |
| Bought inputs                           |                           |                                           |                           |                                           |
| Selected the variety to plant           |                           |                                           |                           |                                           |
| Planted                                 |                           |                                           |                           |                                           |
| Weeded/mulched                          |                           |                                           |                           |                                           |
| Applied Fungicides/insecticides /manure |                           |                                           |                           |                                           |
| Harvested                               |                           |                                           |                           |                                           |
| Transported                             |                           |                                           |                           |                                           |
| Processed                               |                           |                                           |                           |                                           |
| Sold                                    |                           |                                           |                           |                                           |



Referring to the last cropping **YEAR**, who in the family decided or did the following activities regarding **cassava**?

| Activity                        | Season 1                  |                                           | Season 2                  |                                           |
|---------------------------------|---------------------------|-------------------------------------------|---------------------------|-------------------------------------------|
|                                 | Who in the family decided | Who in the family worked paid labor costs | Who in the family decided | Who in the family worked paid labor costs |
| Land preparation                |                           |                                           |                           |                                           |
| Bought inputs                   |                           |                                           |                           |                                           |
| Selected the variety to plant   |                           |                                           |                           |                                           |
| Planted                         |                           |                                           |                           |                                           |
| Weeded                          |                           |                                           |                           |                                           |
| Applied Fungicides/insecticides |                           |                                           |                           |                                           |
| Harvested                       |                           |                                           |                           |                                           |
| Transported                     |                           |                                           |                           |                                           |
| Processed                       |                           |                                           |                           |                                           |
| Sold                            |                           |                                           |                           |                                           |

#### Part N: Access to extension services, credit and inputs

Has your family received any training in pest and disease management of **potato**?..... If yes, who in the family was trained .....

Has your family received any training in pest and disease management of **sweetpotato**?..... If yes, who in the family was trained .....

Has your family received any training in pest and disease management of **banana**?..... If yes, who in the family was trained .....

Has your family received any training in pest and disease management of **cassava**?..... If yes, who in the family was trained .....

Did any agricultural extension officer get in contact with your family during the last 12 months?..... If yes, who in the family was contacted.....

How many times (days) was your family contacted in the last 12 months?.....

What services did your family receive from the extension worker in the last cropping season?

.....

.....

.....

**What are your extension needs?**

- 1.....
- 2.....
- 3.....

In a year, how often do you receive diseases and pest control information/advice from the following sources? (see codes below)

| Information source                                 | Time when advice is received | Number of times advice is received | Crop(s) for which advice is received | Was the advice effective (Yes/No) |
|----------------------------------------------------|------------------------------|------------------------------------|--------------------------------------|-----------------------------------|
| Neighbor/friend/relative                           |                              |                                    |                                      |                                   |
| Extension agent                                    |                              |                                    |                                      |                                   |
| Agro-dealer                                        |                              |                                    |                                      |                                   |
| NGO                                                |                              |                                    |                                      |                                   |
| Radio/Tv                                           |                              |                                    |                                      |                                   |
| Agricultural research organizations                |                              |                                    |                                      |                                   |
| Middle men/produce buyers                          |                              |                                    |                                      |                                   |
| Agricultural shows/farmer field schools/field days |                              |                                    |                                      |                                   |
| Local farmers' group                               |                              |                                    |                                      |                                   |
| Farmer cooperative/ society                        |                              |                                    |                                      |                                   |
| Other (specify).....                               |                              |                                    |                                      |                                   |
|                                                    |                              |                                    |                                      |                                   |

**Codes:** 1. Never, 2. Only when the disease or pest appears in my field, 3. Only when the disease or pest appears in my neighbor's field , 4. Every season, does not matter if the disease or pest is present , 5. Other (specify).....

Has any member of your household received any credit in the last 12 months?.....If yes, who in the family received credit.....

If NOT, give reasons (1.No need 2.Risky 3.High interest rates 4. No banks nearby 5.No income to service the loan 6.Short repayment time 7.Other .....)

.....

.....

If you received credit, how much did you receive and for what purpose?

| Amount of credit<br>(RWF/BIF) | Credit source | Reason for getting credit | Who got the credit |
|-------------------------------|---------------|---------------------------|--------------------|
|                               |               |                           |                    |
|                               |               |                           |                    |
|                               |               |                           |                    |

**Credit sources:** 1. Input dealer 2. Neighbors/friends/family 3.Private money lender 4. Commercial bank 5. Farmer's cooperative 6.Women's group 7. Other (specify)

**Thank you for your time**
